# Supplementary material for: A mesoporous aluminium metal–organic framework with 3 nm open pores
Source: Royal Society of Chemistry journal article supplement (doi:10.1039/c2ta00030j), 2012-10-15
Supplement: c2ta00030j.pdf [file c2ta00030j.pdf]

## Electronic Supplementary Information

# A mesoporous aluminium metal-organic framework with 3 nm open pores

Sheng-Han Lo,<sup>a</sup> Ching-Hsuan Chien,<sup>a</sup> Yu-Lun Lai,<sup>b</sup> Chun-Chuen Yang,<sup>c</sup> Jey Jau Lee,<sup>d</sup> Duraisamy Senthil Raja,<sup>a</sup> and Chia-Her Lin<sup>a\*</sup>

<sup>a</sup>Department of Chemistry, Chung-Yuan Christian University, Chung Li, Taiwan 32023; <sup>b</sup>Green Energy and Environment Research Laboratories, Industrial Technology Research Institute, Hsinchu, Taiwan, 31040; <sup>c</sup>Department of Physics, Chung Yuan Christian University, Chung Li, Taiwan 32023; <sup>d</sup>National Synchrotron Radiation Research Center, Hsinchu, Taiwan 30076.

Corresponding Authors:

Prof. Chia-Her Lin

E-mail: chiaher@cycu.edu.tw

Fax: +886-3-2653399

Tel: +886-3-2653315

### Structural Modeling and Powder X-Ray Diffraction Analysis.

The theoretical model of CYCU-3 was carried out using the Materials Studio 5.5.<sup>S1</sup> Initially, only the Al atoms were included using the fractional coordinates found in MIL-68(V). The unit cell was elongated accordingly by the experimental lattice constants. Finally, the atoms of the 4,4'-stilbenedicarboxylate linker without hydrogen atoms were inserted. The geometry optimizations converged to give finally a plausible crystal structure by adjusts the bond length of aluminum to oxygen atoms bond angles of O-Al-O. The calculated and measured powder X-ray diffraction patterns are in good agreement (Fig. S2). The export res file was further examined by *PLATON*<sup>S2</sup> software by the Addsym command. This would produce a new suitable res file for the further use on the structure analysis. The models were used as a starting point for the Rietveld refinement.

The structure of CYCU-3 was solved from the powder XRD pattern of the activated sample, heated at 150 °C, to prevent re-absorption of water. The lab and synchrotron powder X-ray diffraction were measured for further considerations. Due to higher ratio of intensity to noise of CYCU-3 in the measurement results by synchrotron radiation, the lab-machine measurements were used for the profile analysis. Extractions of the peak positions, pattern indexing and Rietveld refinements were carried out with the GSAS program.<sup>S3</sup> For CYCU-3, the symmetric *Cmcm* space group was chosen to solve the structure. The experimental powder X-ray diffraction pattern was indexed as an orthorhombic system with a lattice constant of  $a=33.776$ ,  $b=59.003$ , and  $c=6.742$  Å. The final Rietveld plot corresponds to the crystal structure model and profile factors were display in Fig. S1. Tables S1 and S2 are list the crystallographic data and atomic coordinates.

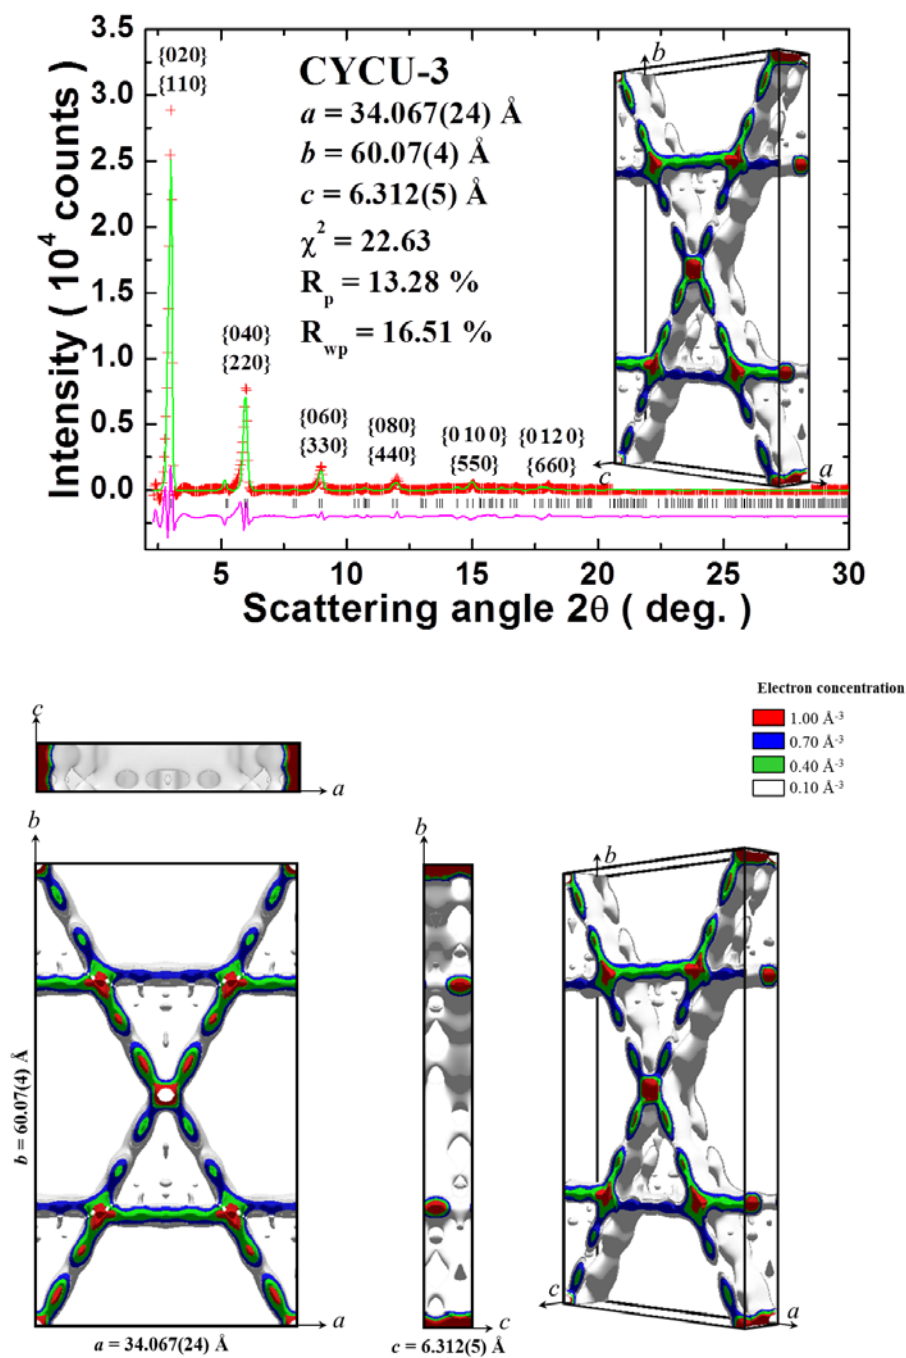

**Fig. S1.** The plots of electron density from X-ray powder diffraction pattern for the CYCU-3.

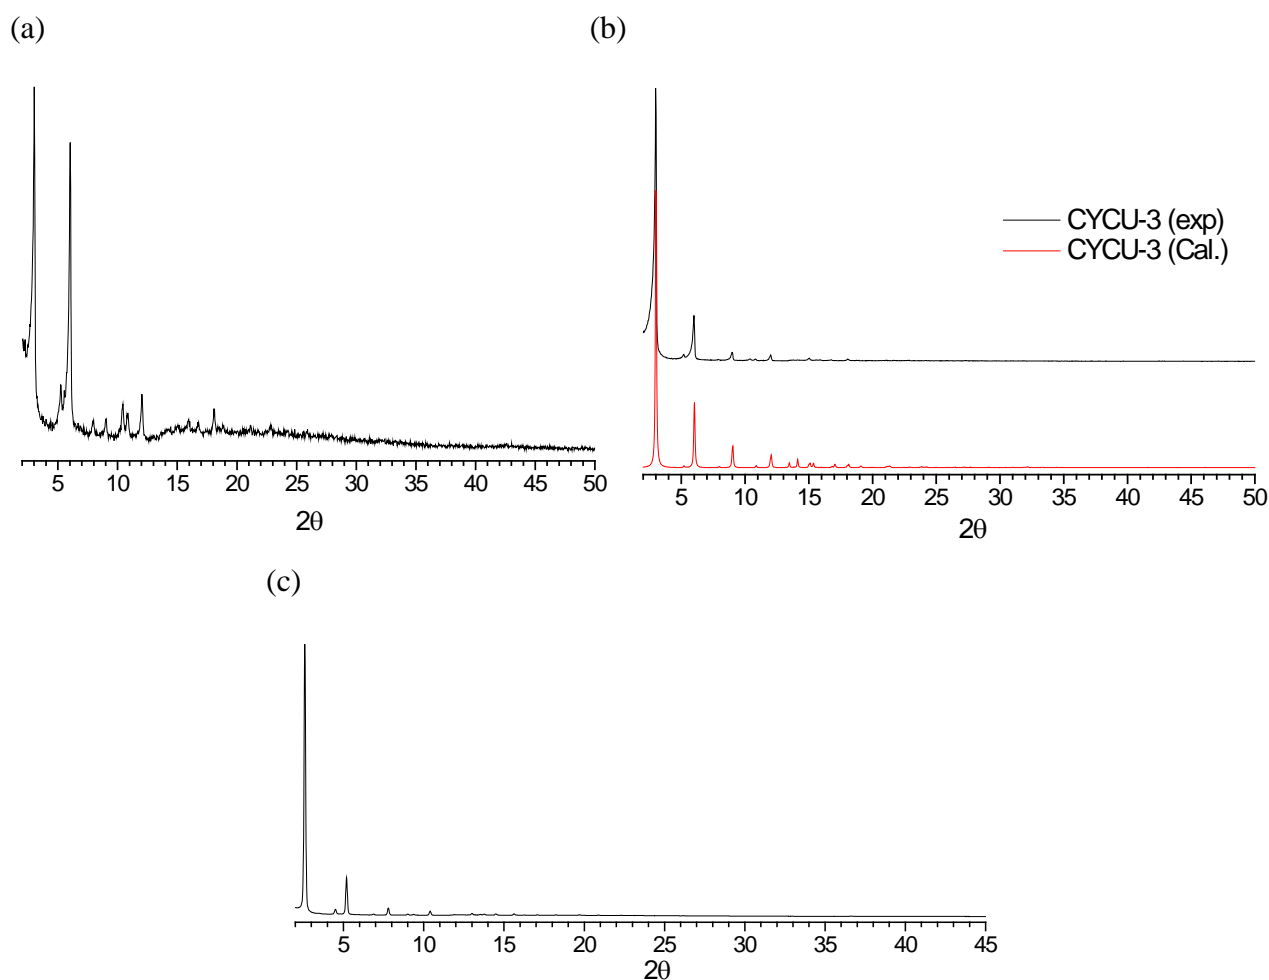

**Fig. S2.** Powder XRD patterns of: (a) as-synthesized CYCU-3; (b) desolvated CYCU-3; (c) desolvated CYCU-3 (measured by synchrotron radiation).

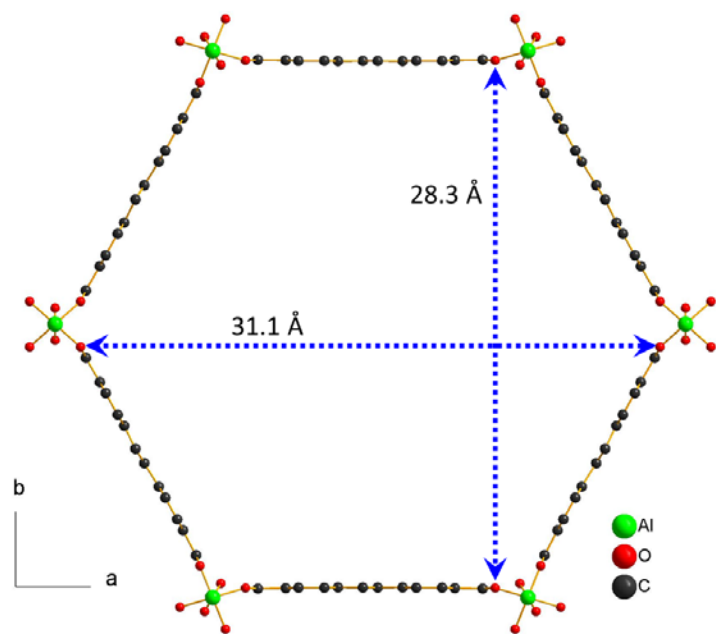

**Fig. S3.** The hexagonal pore sizes of CYCU-3.

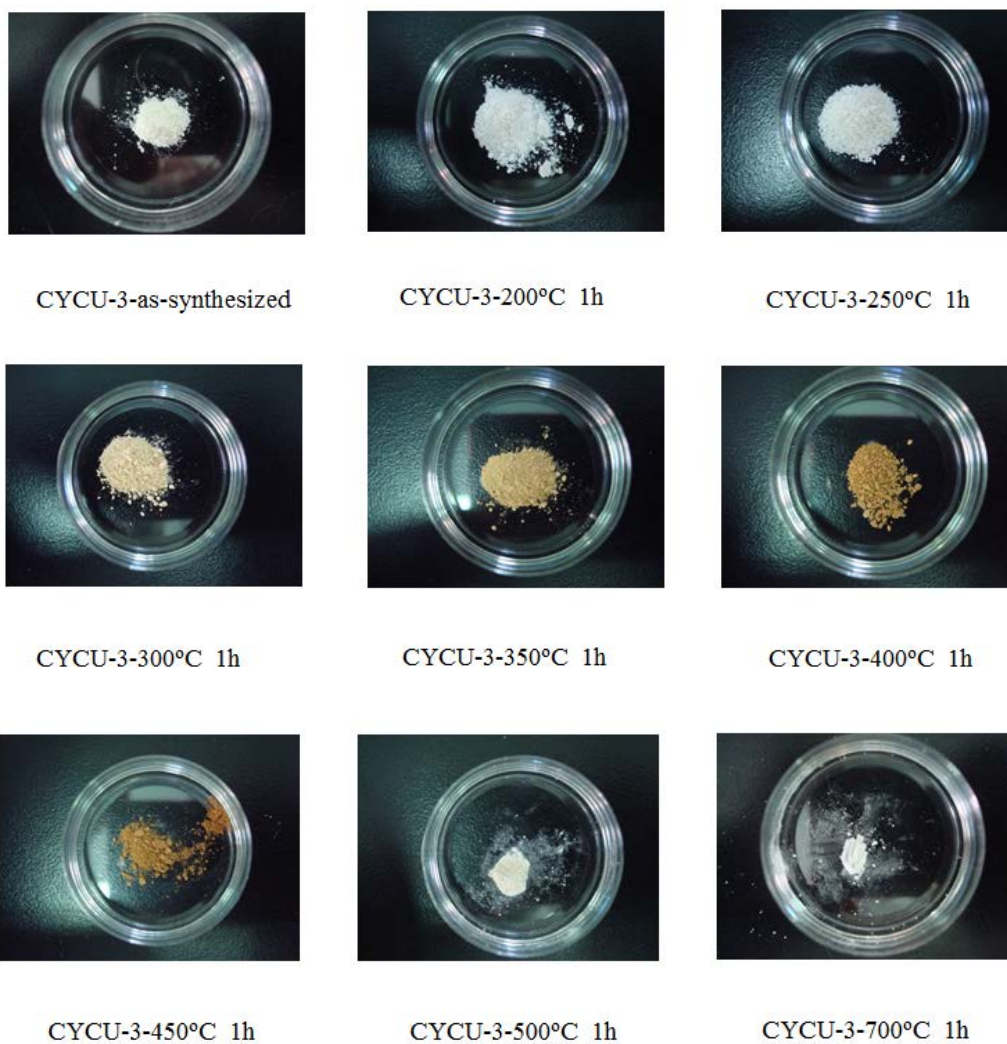

**Fig. S4.** Photographs of the corresponding samples with the specific thermal treatments of CYCU-3.

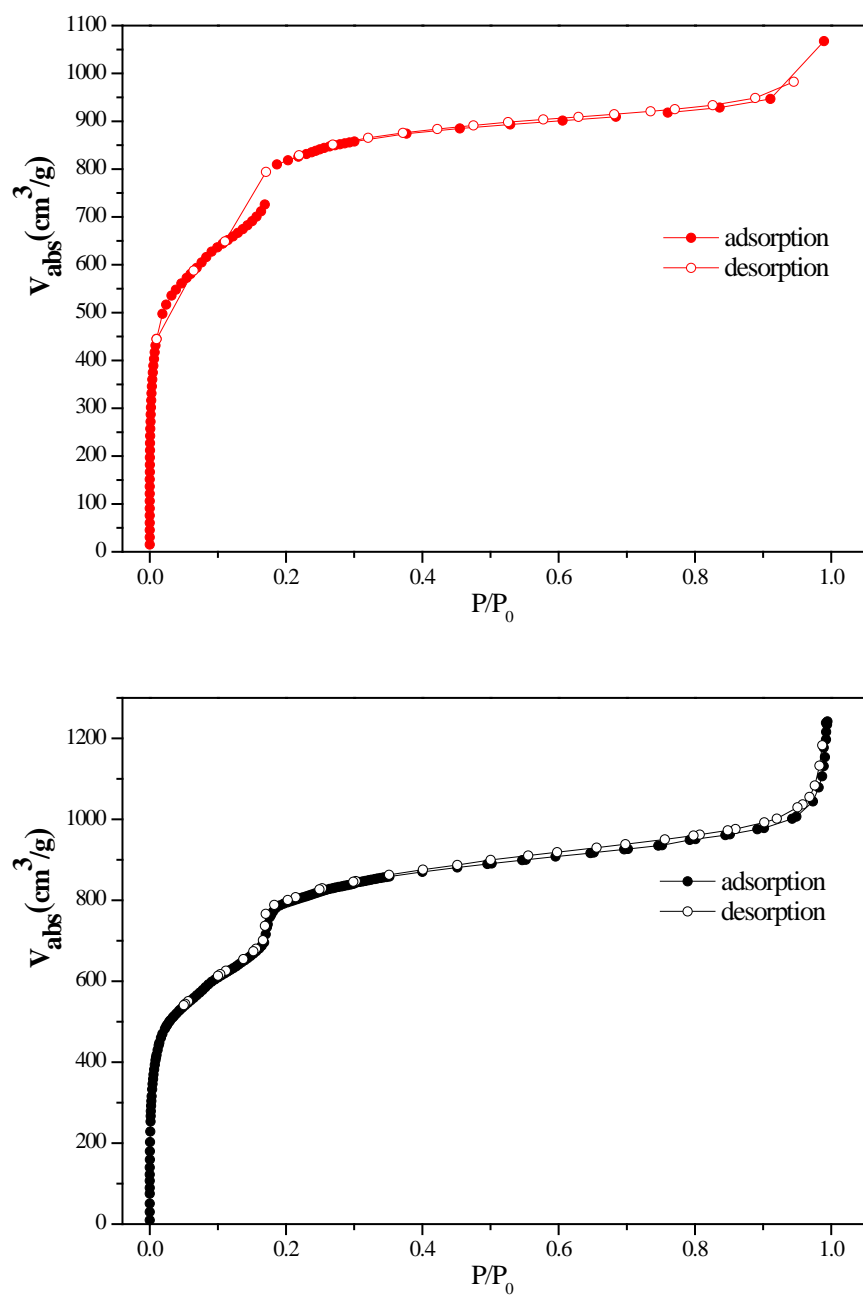

**Fig. S5.** Nitrogen sorption isotherms of CYCU-3 at 77K measured by ASAP 2020 (top) and Autosorp-iQ (bottom).

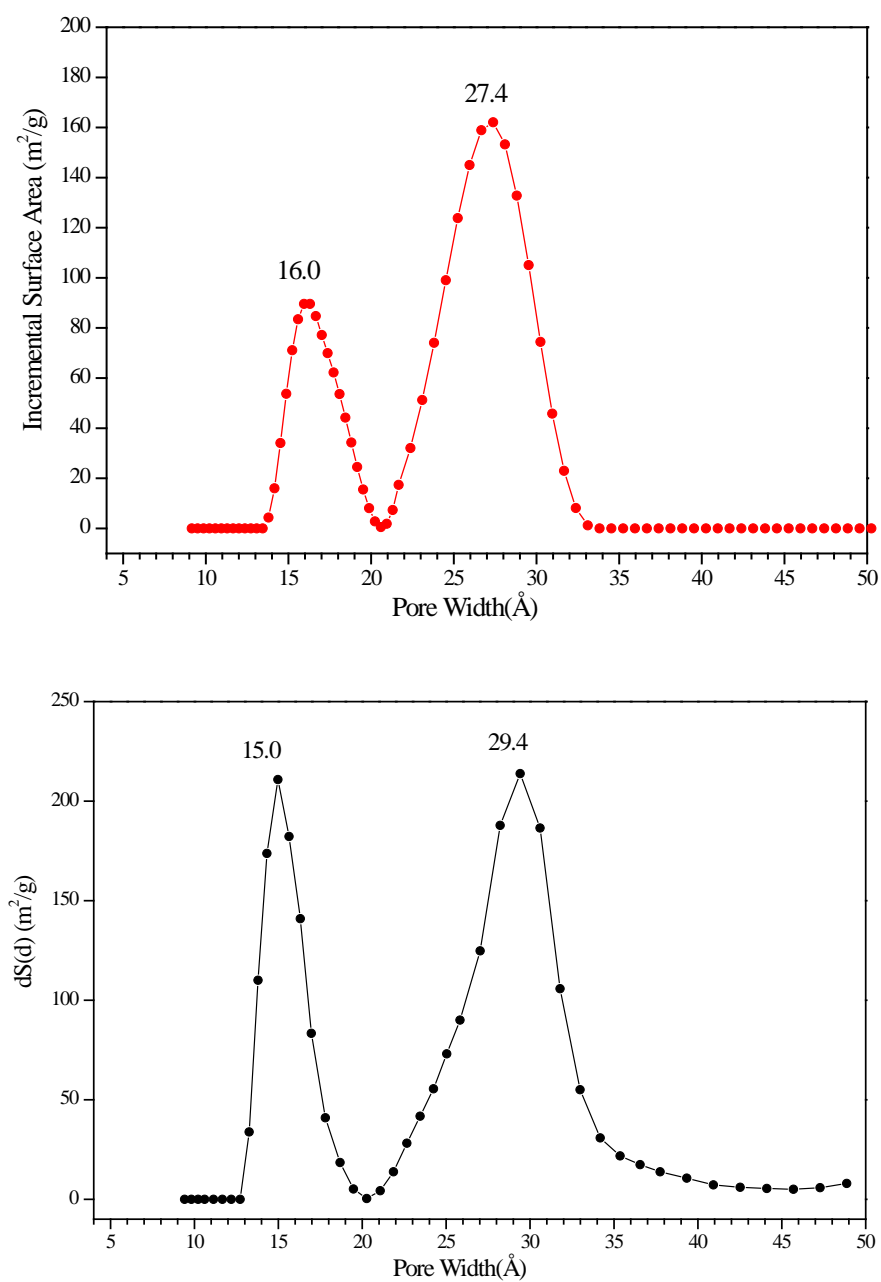

**Fig. S6.** The DFT pore size distribution of CYCU-3 analyzed from nitrogen sorption isotherms at 77K measured by the instruments of ASPA 2020 (top) and Autosorp-iQ (bottom).

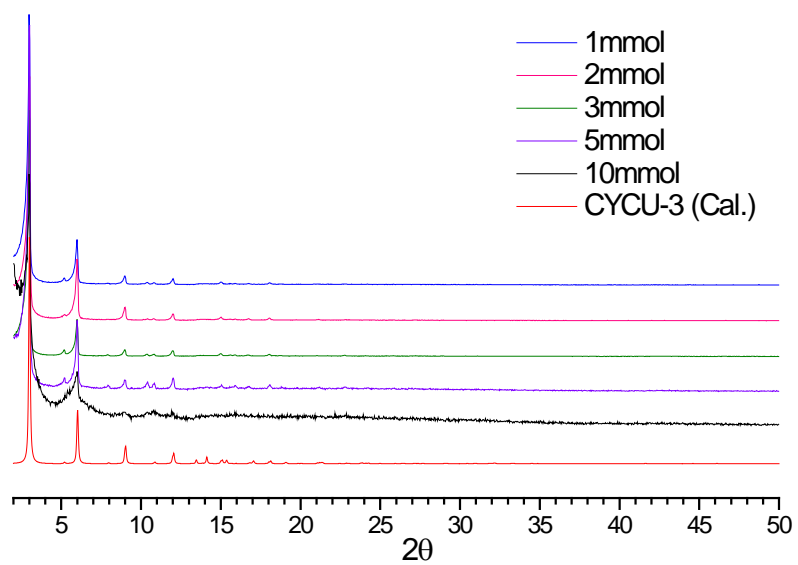

**Fig. S7.** Powder XRD patterns of **CYCU-3** synthesized under various molarity of acetic acid.

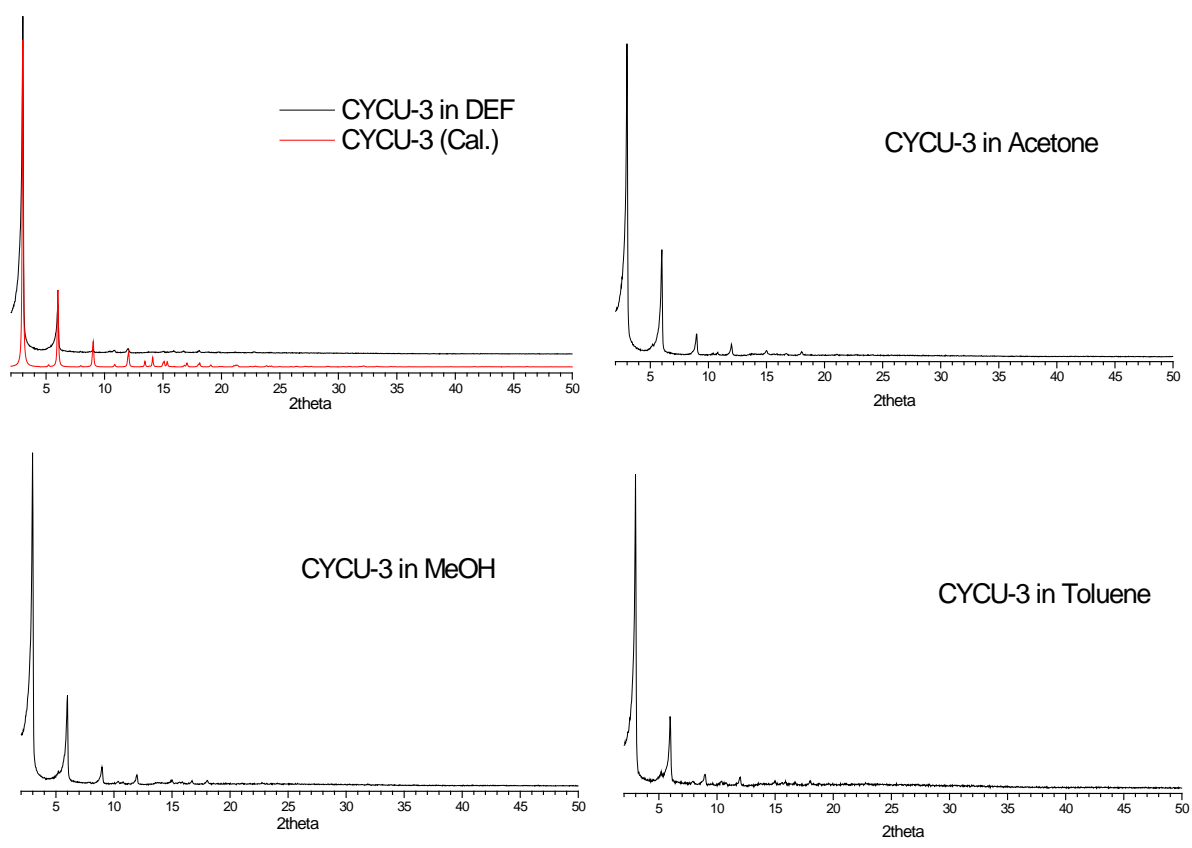

**Fig. S8.** Powder XRD patterns of **CYCU-3** treated with various solvents after desolvation.

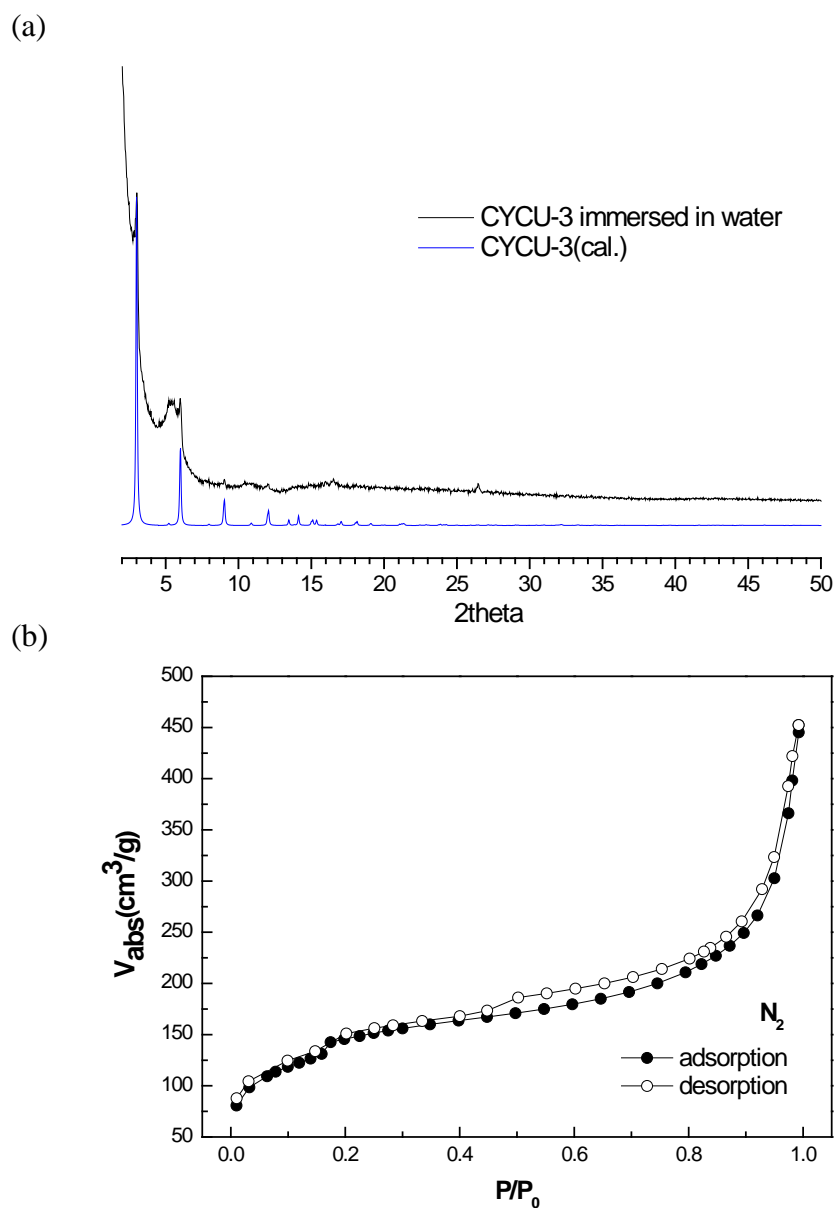

**Fig. S9.** (a) Powder XRD patterns of CYCU-3 sample after immerse in water for 7 day; (b) the nitrogen adsorption and desorption isotherms at 77 K of CYCU-3 after immersed in water and washed with water and hot DMF.

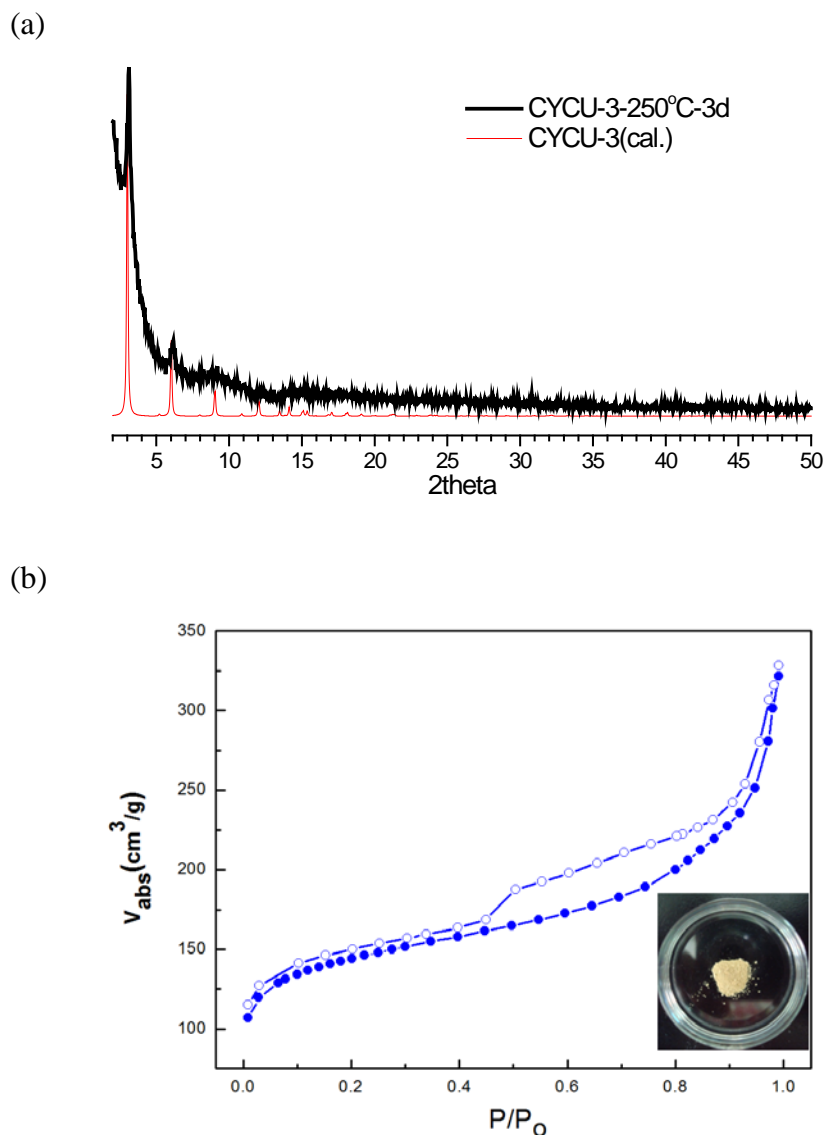

**Fig. S10.** (a) The powder XRD patterns for thermal treated samples of CYCU-3 by 250 °C and 3 days. (b) The N<sub>2</sub> sorption isotherms at 77K and photos of CYCU-3 after heated at 250°C and 3 days (solid circles, adsorption; open circles, desorption).

Table S1 Results and relevant information for the Rietveld refinement of CYCU-3.

|                            | CYCU-3                                                          |
|----------------------------|-----------------------------------------------------------------|
| Formula                    | Al <sub>4</sub> O <sub>20</sub> C <sub>64</sub> H <sub>44</sub> |
| Formula weight             | 1240.2                                                          |
| Temperature (K)            | 298                                                             |
| Wavelength (Å)             | 1.54056                                                         |
| Pattern range (°, 2θ)      | 2– 30                                                           |
| Space group                | <i>Cmcm</i> (No. 63)                                            |
| <i>a</i> (Å)               | 34.067(24)                                                      |
| <i>b</i> (Å)               | 60.07(4)                                                        |
| <i>c</i> (Å)               | 6.312(5)                                                        |
| <i>V</i> (Å <sup>3</sup> ) | 12916.9 (28)                                                    |
| <i>Z</i>                   | 16                                                              |
| $\chi^2$                   | 22.63                                                           |
| <i>R</i> <sub>p</sub>      | 0.1328                                                          |
| <i>R</i> <sub>wp</sub>     | 0.1651                                                          |

Table S2 Atomic coordinates and equivalent isotropic displacement parameters ( $\text{\AA}^3$ ).

| CYCU-3 |        |         |         |                  |           |
|--------|--------|---------|---------|------------------|-----------|
|        | x      | y       | z       | $U_{\text{iso}}$ | Occupancy |
| Al1    | 0.2500 | -0.2500 | -0.5000 | 0.1              | 0.25      |
| Al2    | 0.0000 | 0.0000  | -1.0000 | 0.1              | 1         |
| O1     | 0.2311 | -0.2224 | -0.5766 | 0.1              | 1         |
| O2     | 0.0389 | -0.0192 | -0.9199 | 0.1              | 1         |
| O3     | 0.2988 | -0.2411 | -0.5822 | 0.1              | 1         |
| O4     | 0.2398 | -0.2604 | -0.7500 | 0.1              | 1         |
| O5     | 0.0000 | 0.0120  | -0.7500 | 0.1              | 1         |
| C1     | 0.2249 | -0.2128 | -0.7500 | 0.1              | 1         |
| C2     | 0.2042 | -0.1900 | -0.7500 | 0.1              | 1         |
| C3     | 0.1944 | -0.1793 | -0.5724 | 0.1              | 1         |
| C4     | 0.1748 | -0.1586 | -0.5725 | 0.1              | 1         |
| C5     | 0.1640 | -0.1479 | -0.7500 | 0.1              | 1         |
| C6     | 0.1416 | -0.1271 | -0.6782 | 0.1              | 0.5       |
| C7     | 0.0474 | -0.0292 | -0.7500 | 0.1              | 1         |
| C8     | 0.0697 | -0.0515 | -0.7500 | 0.1              | 1         |
| C9     | 0.0790 | -0.0616 | -0.9276 | 0.1              | 1         |
| C10    | 0.0984 | -0.0818 | -0.9274 | 0.1              | 1         |
| C11    | 0.1088 | -0.0920 | -0.7500 | 0.1              | 1         |
| C12    | 0.1275 | -0.1140 | -0.8224 | 0.1              | 0.5       |
| C13    | 0.3185 | -0.2417 | -0.7500 | 0.1              | 1         |
| C14    | 0.3631 | -0.2413 | -0.7500 | 0.1              | 1         |
| C15    | 0.3833 | -0.2408 | -0.5711 | 0.1              | 1         |
| C16    | 0.4244 | -0.2409 | -0.5696 | 0.1              | 1         |
| C17    | 0.4462 | -0.2405 | -0.7500 | 0.1              | 1         |
| C18    | 0.4882 | -0.2408 | -0.6714 | 0.1              | 1         |

## Reference

- S1. Accelrys, *Materials Studio Release Notes*, 5.5, Accelrys Software, Inc., San Diego, 2008.
- S2. A. L. Spek, *PLATON*; The University of Utrecht: Utrecht, The Netherlands, 1999.
- S3. A. C. Larson and R. B. Von Dreele, *General Structure Analysis System (GSAS)*; Los Alamos National Laboratory, USA, 1994.
